# Supplementary material for: A bifunctional luminescent europium–organic framework for highly selective sensing of nitrobenzene and 4-aminophenol
Source: Royal Society of Chemistry journal article supplement (doi:10.1039/c7ra08885j), 2017-01-01
Supplement: c7ra08885j1.pdf [file c7ra08885j1.pdf]

## *Electronic Supplementary Information (ESI)*

### **Bifunctional luminescent europium metal-organic framework for highly selective sensing of nitrobenzene and 4-aminophenol †**

Ming-Liang Gao,<sup>a</sup> Xiao-Man Cao,<sup>a</sup> Yu-Yang Zhang,<sup>a</sup> Mei-Hong Qi,<sup>a</sup> Shi-Ming Wang,<sup>b</sup> Lin Liu<sup>\*a</sup> and Zheng-Bo Han<sup>\*a</sup>

<sup>a</sup> College of Chemistry, Liaoning University, Shenyang 110036 P.R. China E-mail: ceshzb@lnu.edu.cn; liulin@lnu.edu.cn.

<sup>b</sup> College of Light Industry, Liaoning University, Shenyang 110036, People's Republic of China.

#### **Contents**

|                                                                                                                                                                                                                             |   |
|-----------------------------------------------------------------------------------------------------------------------------------------------------------------------------------------------------------------------------|---|
| <b>Materials and general methods</b> .....                                                                                                                                                                                  | 2 |
| <b>Preparation of (DMA)<sub>2</sub>[Eu<sub>6</sub>(μ<sub>3</sub>-OH)<sub>8</sub>(BPDC)<sub>6</sub>]·x(solvent)</b> .....                                                                                                    | 2 |
| <b>Experimental details for the anti-interference ability of Eu-MOF</b> .....                                                                                                                                               | 2 |
| <b>Fig. S1</b> PXRD pattern of <b>Eu-MOF</b> .....                                                                                                                                                                          | 2 |
| <b>Fig. S2</b> The thermal stability of Eu-MOF was examined by thermogravimetric analysis (TGA) in the temperature range of 25-900 °C with a heating rate of 5 °C min <sup>-1</sup> under a N <sub>2</sub> atmosphere.....  | 3 |
| <b>Fig. S3</b> Excitation (at 284 nm) and emission (at 385 nm) spectra of H <sub>2</sub> BPDC in the solid state at room temperature.....                                                                                   | 3 |
| <b>Fig. S4</b> Excitation (at 290 nm) and emission (at 373 nm) spectra of <b>Eu-MOF</b> in the solid state at room temperature.....                                                                                         | 3 |
| <b>Fig. S5</b> Emission spectra of <b>Eu-MOF</b> (5 mg) at room temperature in different solvents (5 mL) (λ <sub>ex</sub> = 290 nm).....                                                                                    | 4 |
| <b>Fig. S6</b> The luminescent intensity (I <sub>0</sub> /I) versus the NB concentration.....                                                                                                                               | 4 |
| <b>Fig. S7</b> The luminescent intensity of Eu-MOF in different concentration of nitro compounds (a) p-NP, (b) 4-NP, (c) DNP, (d) o-NP, (e) p-ND, (f) 3,5-DB (λ <sub>ex</sub> = 317 nm).....                                | 5 |
| <b>Fig. S8</b> Luminescence intensity ratio histograms of <b>Eu-MOF</b> dispersed in methanol with the addition of different aromatic compounds (pink) and subsequent addition of NB (blue) (λ <sub>ex</sub> = 317 nm)..... | 5 |
| <b>Fig. S9</b> Reproducibility of the quenching ability of <b>Eu-MOF</b> dispersed in methanol to NB (λ <sub>ex</sub> = 317 nm).....                                                                                        | 6 |
| <b>Fig. S10</b> The PXRD patterns of <b>Eu-MOF</b> : the samples after 10 quenching cycles.....                                                                                                                             | 6 |
| <b>Fig. S11</b> The UV-vis absorption spectra of NB, DNP, p-NP, 4-NP, o-NP, 3, 5-DB, p-ND, AN, o-PA and 4-AP in methanol.....                                                                                               | 7 |
| <b>Fig. S12</b> The luminescent intensity (I <sub>0</sub> /I) versus the 4-AP concentration.....                                                                                                                            | 7 |
| <b>Fig. S13</b> Luminescence intensity ratio histograms of <b>Eu-MOF</b> dispersed in methanol with the addition of different organic amines (pink) and subsequent addition of 4-AP (blue) (λ <sub>ex</sub> = 317 nm).....  | 7 |
| <b>Fig. S14</b> Reproducibility of the quenching ability of <b>Eu-MOF</b> dispersed in methanol to 4-AP (λ <sub>ex</sub> = 317 nm).....                                                                                     | 8 |
| <b>Table S1</b> Summary of the quenching efficiency of luminescent MOF sensors for                                                                                                                                          |   |

### Materials and general methods

All solvents and starting materials for synthesis were purchased commercially and were used as received. Powder X-ray diffraction (PXRD) patterns were collected with a Bruker AXS D8 advanced automated diffractometer with Cu- $K_{\alpha}$  radiation. Luminescencespectra for the solid samples and liquid samples were investigated with a Hitachi F-4500 fluorescence spectrophotometer and Varian Cary Eclipse Fluorescence spectrophotometer, respectively.

#### Preparation of $(\text{DMA})_2[\text{Eu}_6(\mu_3\text{-OH})_8(\text{BPDC})_6] \cdot x(\text{solvent})$ :

A solution of  $\text{Eu}(\text{NO}_3)_3 \cdot 6\text{H}_2\text{O}$  (9 mg, 0.0225 mmol),  $\text{H}_2\text{BPDC}$  (5 mg, 0.0225 mmol), 2-Fluorobenzoic acid (95.2 mg 0.675 mmol), DMF (2 ml) and EtOH (0.5 ml) was prepared in a 20 ml scintillation vial stirred in a glass vial for ca. 20 mins at room temperature which was heated in an oven to 378 K for 36 hours in a preheated oven, followed by slow cooling ( $5 \text{ K h}^{-1}$ ) to room temperature. The colorless polyhedral crystals of 1 were obtained and washed with DMF and air-dried (yield: ca. 53%). The counter cation  $(\text{CH}_3)_2\text{NH}_2^+$  is generated via decomposition of the DMF solvent. EA. Calcd for  $\text{C}_{88}\text{H}_{72}\text{Eu}_6\text{O}_{32}\text{N}_2$ : C, 40.95; H, 2.81; N, 1.09. Found: C, 39.56; H, 2.31; N, 1.12. FT-IR (KBr pellets): 3426 (s), 2930 (w), 1668 (vs), 1604 (s), 1542 (m), 1405 (vs), 1252 (m), 1172 (m), 1094 (m), 844 (m), 772 (m), 664 (w), 553 (m)  $\text{cm}^{-1}$ .

#### Experimental details for the anti-interference ability of Eu-MOF

The powder sample of Eu-MOF (24 mg) was suspended in methanol (100 mL). Treated by ultrasonication and then aged to generate stable suspensions before the fluorescence study. Some aromatic compounds with the same concentrations of 70 ppm were added to the methanol suspension of Eu-MOF, and the corresponding emission spectra were monitored. With the subsequent addition of 70 ppm nitrobenzene into the parallel tests, the corresponding emission spectra were monitored.

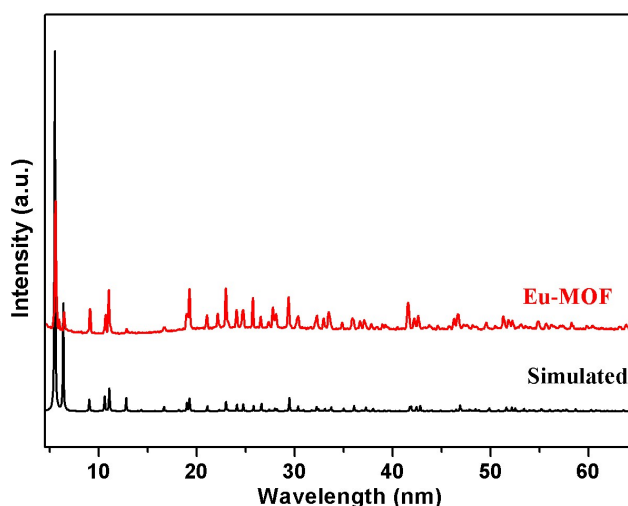

Fig. S1 PXRD pattern of Eu-MOF

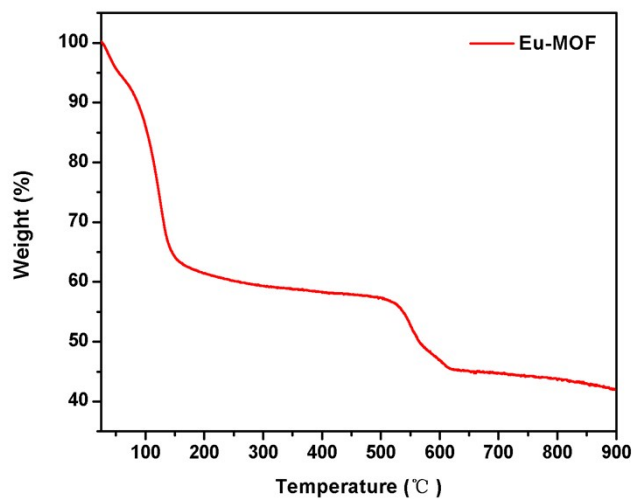

**Fig. S2** The thermal stability of Eu-MOF was examined by thermogravimetric analysis (TGA) in the temperature range of 25-900 °C with a heating rate of 5 °C min<sup>-1</sup> under N<sub>2</sub> atmosphere.

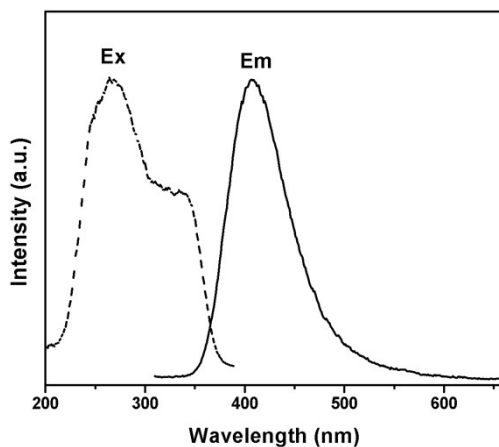

**Fig. S3** Excitation ( $\lambda_{\text{ex}} = 264 \text{ nm}$ ) and emission ( $\lambda_{\text{em}} = 407 \text{ nm}$ ) spectra of H<sub>2</sub>BPDC in the solid state at room temperature.

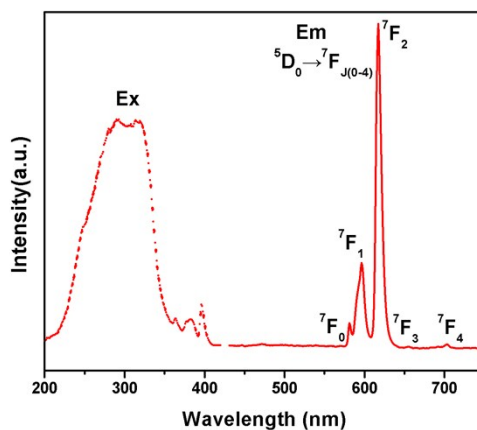

**Fig. S4** Excitation ( $\lambda_{\text{ex}} = 317 \text{ nm}$ ) and emission ( $\lambda_{\text{em}} = 615 \text{ nm}$ ) spectra of **Eu-MOF** in the solid state at room temperature.

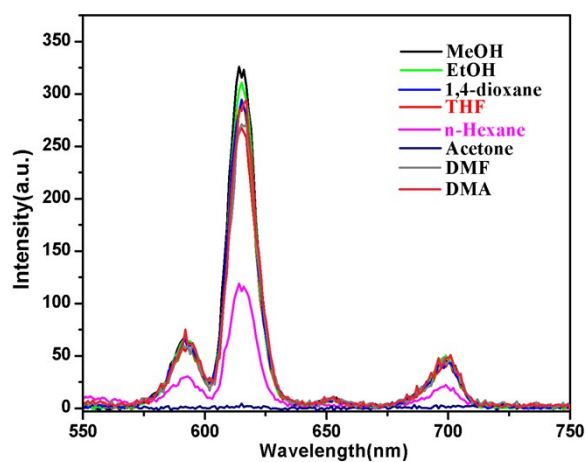

**Fig. S5** Emission spectra of Eu-MOF (5 mg) at room temperature in different solvents (5 mL) ( $\lambda_{\text{ex}} = 317$  nm).

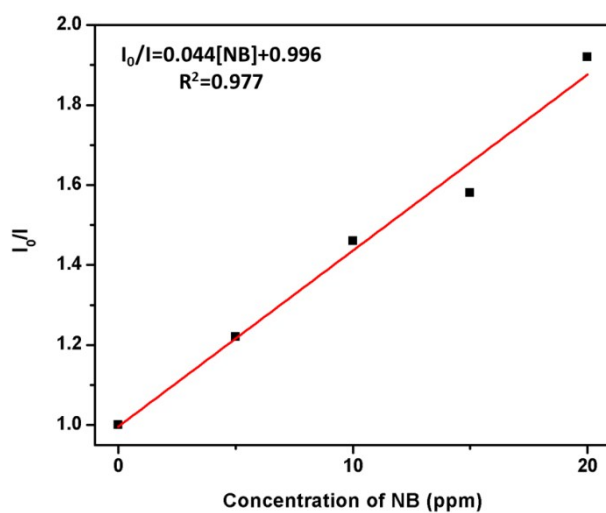

**Fig. S6** The luminescent intensity ( $I_0/I$ ) versus the NB concentration.

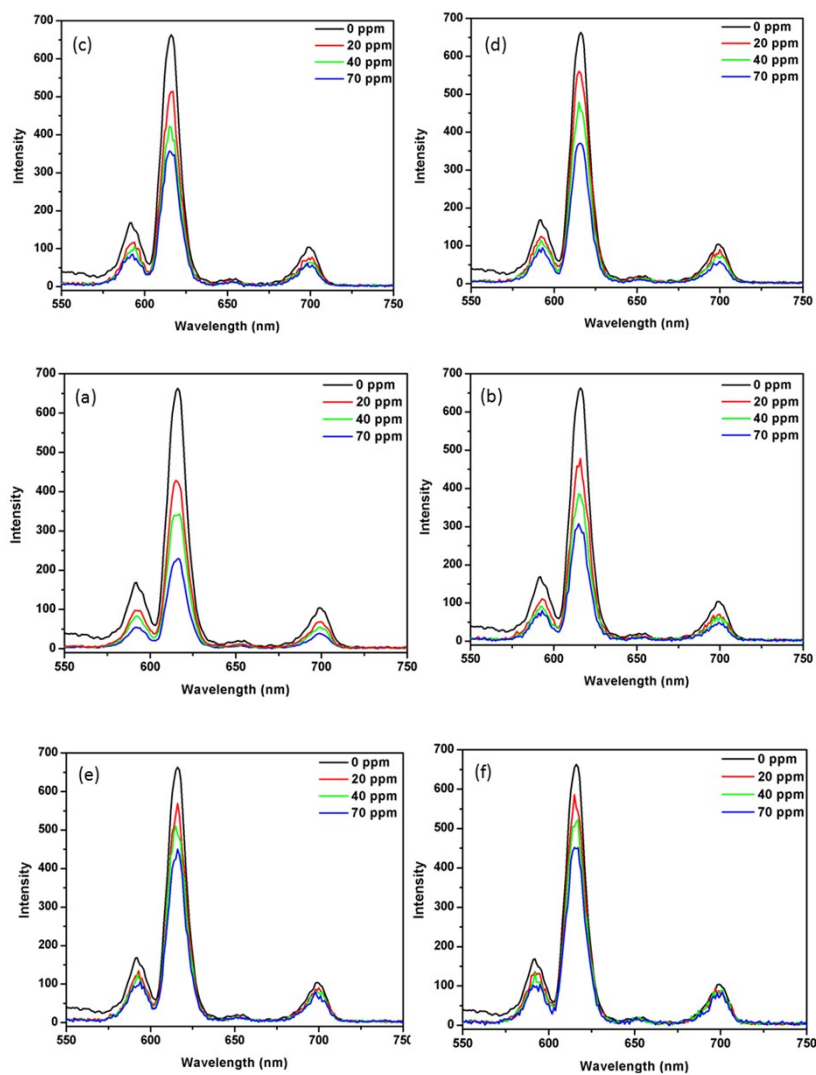

**Fig.S7** The luminescent intensity of Eu-MOF in different concentration of nitro compounds (a) p-NP, (b) 4-NP, (c) DNP, (d) o-NP, (e) p-ND, (f) 3,5-DB ( $\lambda_{ex} = 317$  nm).

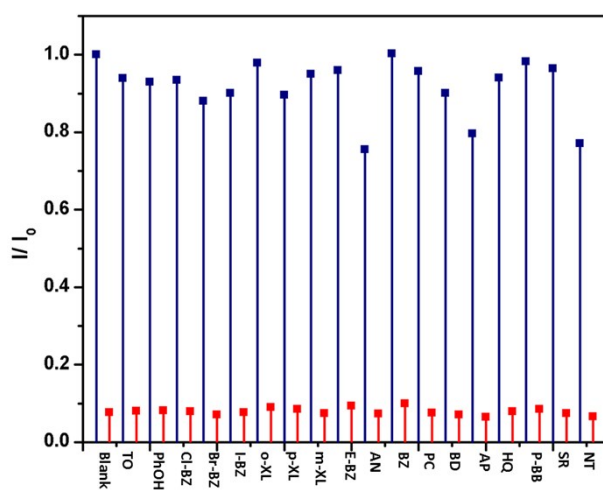

**Fig. S8** Luminescence intensity ratio histograms of Eu-MOF dispersed in methanol with the addition of different aromatic compounds (blue) and subsequent addition of NB (red) ( $\lambda_{ex} = 317$  nm).

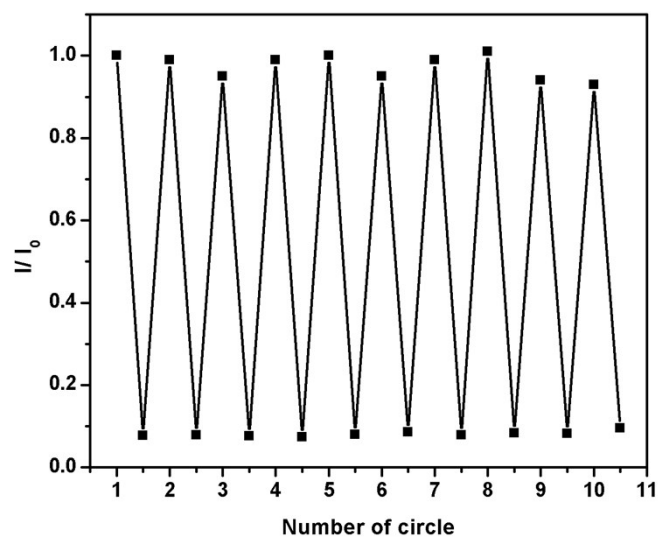

**Fig. S9** Reproducibility of the quenching ability of **Eu-MOF** dispersed in methanol to NB ( $\lambda_{\text{ex}}=317$  nm).

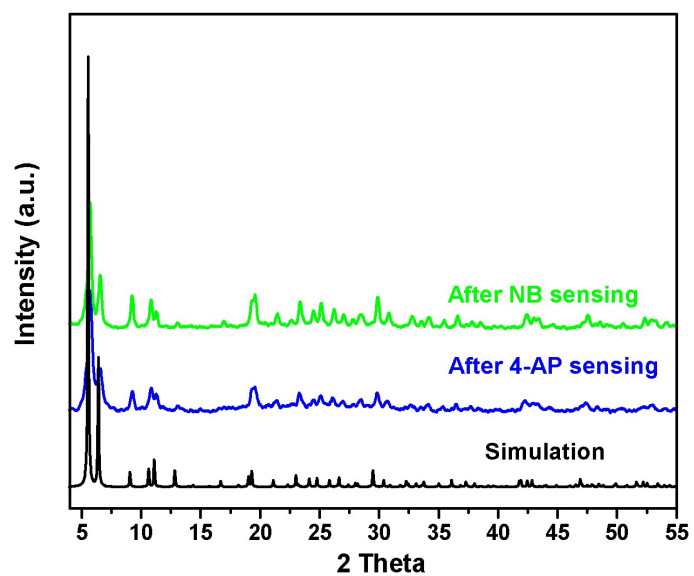

**Fig. S10** The PXRD patterns of **Eu-MOF**: the samples after 10 quenching cycles.

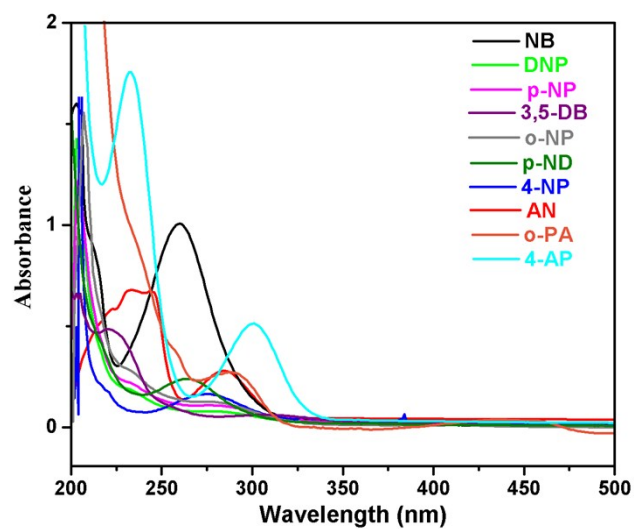

**Fig. S11** The UV-vis absorption spectra of NB, DNP, p-NP, 4-NP, o-NP, 3, 5-DB, p-ND, AN, o-PA and 4-AP in methanol.

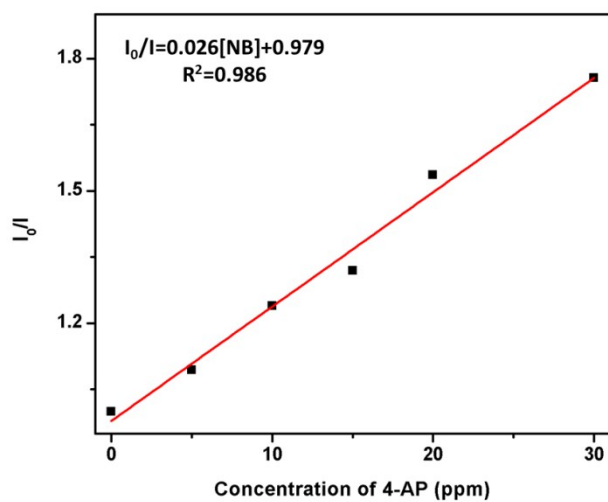

**Fig. S12** The luminescent intensity ( $I_0/I$ ) versus the 4-AP concentration.

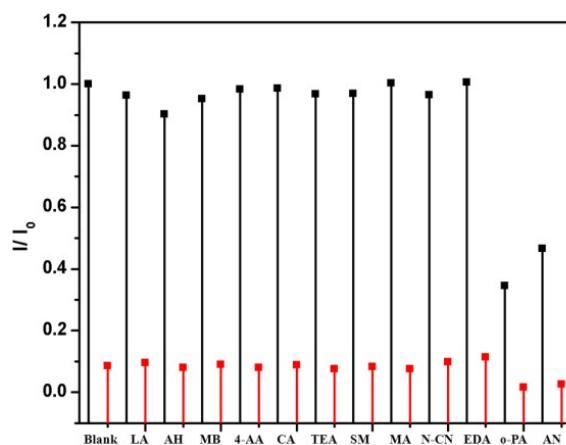

**Fig. S13** Luminescence intensity ratio histograms of **Eu-MOF** dispersed in methanol with the addition of different organic amines (black) and subsequent addition of 4-AP (red) ( $\lambda_{\text{ex}} = 317 \text{ nm}$ ).

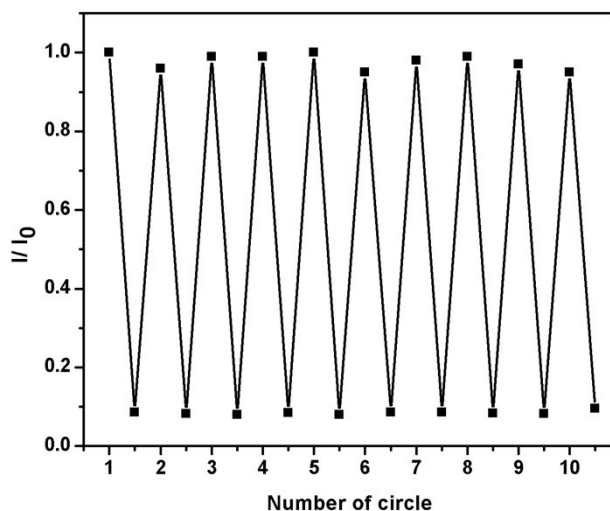

**Fig. S14** Reproducibility of the quenching ability of Eu-MOF dispersed in methanol to 4-AP ( $\lambda_{\text{ex}} = 317$  nm).

**Table S1** Summary of the quenching efficiency of luminescent MOF sensors for NB<sup>a</sup>

| MOF                                                                                                                                                                                        | Quantity(mg)/solvent (mL) | NB concentration | Quenching efficiency | Ref.                   |
|--------------------------------------------------------------------------------------------------------------------------------------------------------------------------------------------|---------------------------|------------------|----------------------|------------------------|
| [Tb(L <sub>1</sub> ) <sub>2.5</sub> (L <sub>2</sub> ) <sub>1.2</sub> (H <sub>2</sub> O) <sub>2</sub> ·2H <sub>2</sub> O                                                                    | 3 mg/5 mL                 | 1000 ppm         | 60 % <sup>a</sup>    | [1]                    |
| {[(UO <sub>2</sub> ) <sub>2</sub> (H <sub>2</sub> TTHA)(H <sub>2</sub> O)]·4,4'-bipy·2H <sub>2</sub> O} <sub>n</sub>                                                                       | 2 mg/3 mL                 | 1000 ppm         | 90 % <sup>b</sup>    | [2]                    |
| Mg <sub>4</sub> (L)(DMF) <sub>4</sub> (H <sub>2</sub> O) <sub>4</sub> (DMF) <sub>0.5</sub>                                                                                                 | 5 mg/3 mL                 | 1500 ppm         | 100 %                | [3]                    |
| [Eu(L) <sub>1.5</sub> (DEF) <sub>n</sub>                                                                                                                                                   | 3 mg/5 mL                 | 970 ppm          | 100 %                | [4]                    |
| [Cd <sub>3</sub> (NTB) <sub>2</sub> (DMA) <sub>3</sub> ]·2DMA                                                                                                                              | ≈3 mL                     | 600 ppm          | 79 %                 | [5]                    |
| UiO-66-NH <sub>2</sub>                                                                                                                                                                     | 0.25 mg/5 mL              | 100              | 95.4 %               | [6]                    |
| [Zn <sub>3</sub> (HL) <sub>2</sub> (fma) <sub>2</sub> ]·DMA·H <sub>2</sub> O                                                                                                               | 0.3 mg/3 mL               | 300 ppm          | 92 %                 | [7]                    |
| [Zn <sub>2</sub> (trz) <sub>2</sub> (bpdca)]·DMA                                                                                                                                           | 3 mg/3 mL                 | 500 ppm          | 89 %                 | [8]                    |
| Tb <sup>3+</sup> @NENU-522                                                                                                                                                                 | 3 mg/3 mL                 | 2000 ppm         | 100 %                | [9]                    |
| [Tb(HL)(H <sub>2</sub> O) <sub>4</sub> ]·H <sub>2</sub> O                                                                                                                                  | 5 mg/5 mL                 | 615 ppm          | >95 %                | [10]                   |
| [Cd(ppvppa)(1,4-NDC) <sub>n</sub>                                                                                                                                                          | 2 mg/2 mL                 | 800 ppm          | 94 %                 | [11]                   |
| Cd <sub>2.5</sub> Na(NTB) <sub>2</sub> (DMF) <sub>4</sub> ]·3DMF                                                                                                                           | 0.3 mg/3 mL               | 500 ppm          | 83 %                 | [12]                   |
| [NH <sub>2</sub> (CH <sub>3</sub> ) <sub>2</sub> ][Cd <sub>17</sub> (L) <sub>12</sub> (μ <sub>3</sub> -H <sub>2</sub> O) <sub>4</sub> (DMF) <sub>2</sub> (H <sub>2</sub> O) <sub>2</sub> ] | 5 mg/5 mL                 | 100 ppm          | 92.5 %               | [13]                   |
| [(Cd <sub>2</sub> L·H <sub>2</sub> O) <sub>2</sub> ]·DMF·H <sub>2</sub> O) <sub>n</sub>                                                                                                    | 5 mg/5 mL                 | 500 ppm          | >95 %                | [14]                   |
| [Tb(mtpc) <sub>1.5</sub> (DMA)(H <sub>2</sub> O)]·2H <sub>2</sub> O                                                                                                                        | 0.4 mg/5 mL               | 150ppm           | 87.9 %               | Our previous work [15] |
| (DMA) <sub>2</sub> [Y <sub>9</sub> (μ <sub>3</sub> -OH) <sub>8</sub> (μ <sub>2</sub> -OH) <sub>3</sub> BTB <sub>6</sub> ] <sub>n</sub> ·(solv) <sub>x</sub>                                | 1.8 mg/5 mL               | 60 ppm           | 93.1 %               | Our previous work[16]  |
| (DMA) <sub>2</sub> [Eu <sub>6</sub> (μ <sub>3</sub> -OH) <sub>8</sub> (BPDC) <sub>6</sub> ]·x(solvent)                                                                                     | 1.2 mg/5 mL               | 70 ppm           | 92.3 %               | This work              |

<sup>a</sup> The values were estimated from the literature<sup>[1]</sup>. <sup>b</sup> The values were estimated from the literature<sup>[2]</sup>.

<sup>c</sup> The quantity of MOF is missed in literature<sup>[5]</sup>.

#### Reference:

- [1] J. Z. Wang, W. Sun, S. Y. Chang, H. T. Liu, G. N. Zhang, Y. Q. Wang and Z. L. Liu, *RSC Adv.*, 2015, **5**, 48574;  
 [2] J. Song, X. Gao, Z. N. Wang, C. R. Li, Q. Xu, F. Y. Bai, Z. F. Shi and Y. H. Xing, *Inorg. Chem.*, 2015, **54**, 9046;  
 [3] S. L. Xie, H. F. Wang, Z. H. Liu, R. Dai and L. Z. Huang, *RSC Adv.*, 2015, **5**, 7160;



- [4] S. N. Zhao, X. Z. Song, M. Zhu, X. Meng, L. L. Wu, S. Y. Song, C. Wang and H. J. Zhang, *RSC Adv.*, 2015, **5**, 93;
- [5] X. L. Hu, F. H. Liu, C. Qin, K. Z. Shao and Z. M. Su, *Dalton Trans.*, 2015, **44**, 7822;
- [6] K. Vellingiri, D. W. Boukhvalov, S. K. Pandey, A. Deep, K. H. Kim, *Sensor Actuat B-Chem*, 2017, **245**, 305.
- [7] X. L. Hu, C. Qin, L. Zhao, F. H. Liu, K. Z. Shao and Z. M. Su, *RSC Adv.*, 2015, **5**, 49606;
- [8] F. H. Liu, C. Qin, Y. Ding, H. Wu, K. Z. Shao and Z. M. Su, *Dalton Trans.*, 2015, **44**, 1754;
- [9] W. Xie, S. R. Zhang, D. Y. Du, J. S. Qin, S. J. Bao, J. Li, Z. M. Su, W. W. He, Q. Fu and Y. Q. Lan, *Inorg. Chem.*, 2015, **54**, 3290;
- [10] W. Sun, J. Wang, H. Liu, S. Chang, X. Qin, Z. Liu, *Mater. Lett.*, 2014, **126**, 189.
- [11] M. M. Chen, X. Zhou, H. X. Li, X. X. Yang and J. P. Lang, *Cryst. Growth Des.*, 2015, **15**, 2753;
- [12] X. L. Hu, C. Qin, X. L. Wang, K. Z. Shao and Z. M. Su, *New J. Chem.*, 2015, **39**, 7858;
- [13] D. Tian, Y. Li, R. Y. Chen, Z. Chang, G. Y. Wang, X. H. Bu, *J. Mater. Chem. A*, 2014, **2**, 1465.
- [14] Y. P. Xia, Y. W. Li, D. C. Li, Q. X. Yao, Y. C. Du, J. M. Dou, *CrystEngComm*, 2015, **17**, 2459.
- [15] X. M. Cao, N. Wei, L. Liu, L. Li and Z. B. Han, *RSC Adv.*, 2016, **6**, 19459.
- [16] X. L. Huang, L. Liu, M. L. Gao and Z. B. Han, *RSC Adv.*, 2016, **6**, 87945.
